# Supplementary material for: Analyzing the effect of isopropylation on regular and high oleic soybean oils: a lubrication behavior perspective
Source: Royal Society of Chemistry journal article supplement (doi:10.1039/d5ra00058k), 2025-01-01
Supplement: d5ra00058k1.pdf [file d5ra00058k1.pdf]

## Supplementary information

### Analyzing the Effect of Isopropylation on Regular and High Oleic Soybean oil: A Lubrication Behavior Perspective

Piash Bhowmik<sup>a</sup>, Brajendra K. Sharma<sup>b</sup>, Majher I. Sarker<sup>b</sup>, Yachao Wang<sup>a</sup>, Clement Tang<sup>a</sup>, Sougata Roy<sup>c\*</sup>

<sup>a</sup>Department of Mechanical Engineering, University of North Dakota, Grand Forks, ND, USA

<sup>b</sup>Sustainable Biofuels and Coproducts Research, USDA-ARS-NEA-ERRC, Wyndmoor, PA, USA

<sup>c</sup>Department of Mechanical Engineering, Iowa State University, Ames, IA, USA

\*Corresponding author email: sroy@iastate.edu

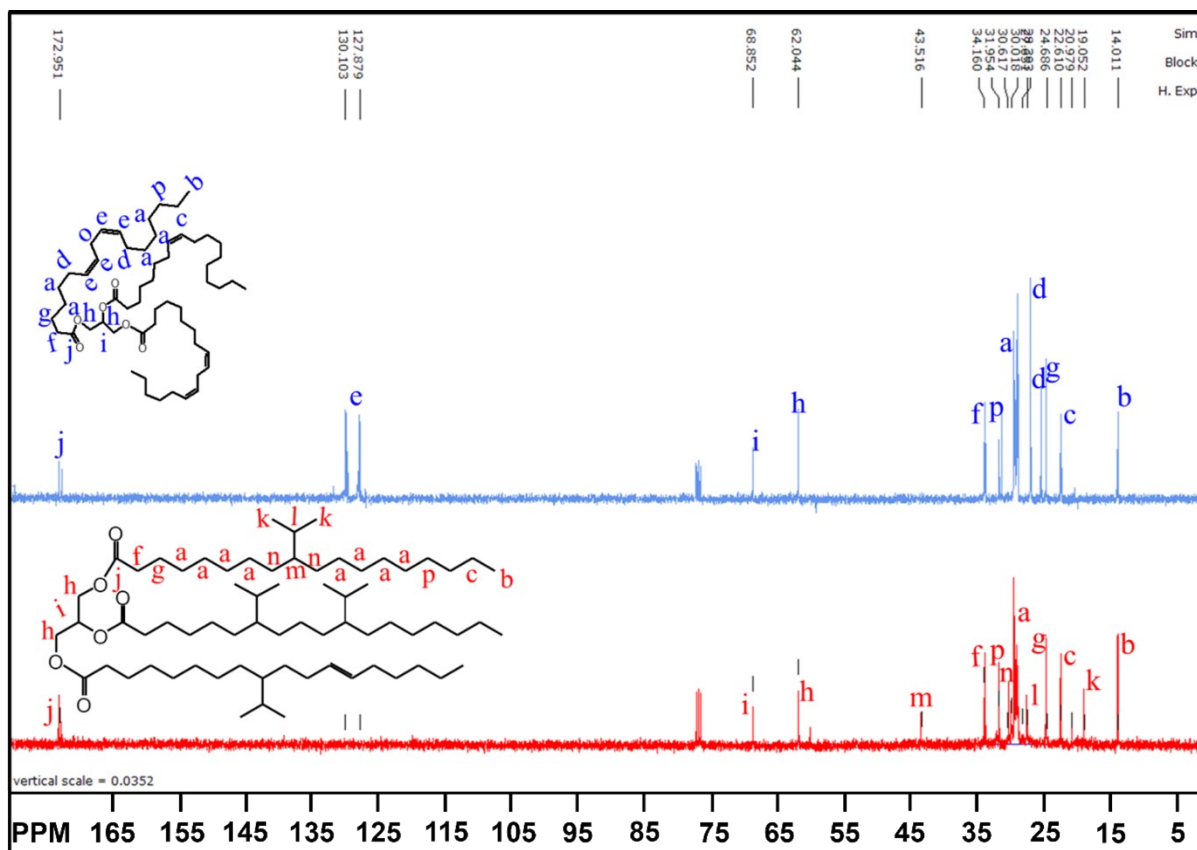

**Figure S1.** Comparison between the  $^{13}\text{C}$  NMR of the RSO (top blue line) and BRSO (bottom red line). Spectral peaks are assigned with their corresponding carbons in letters.

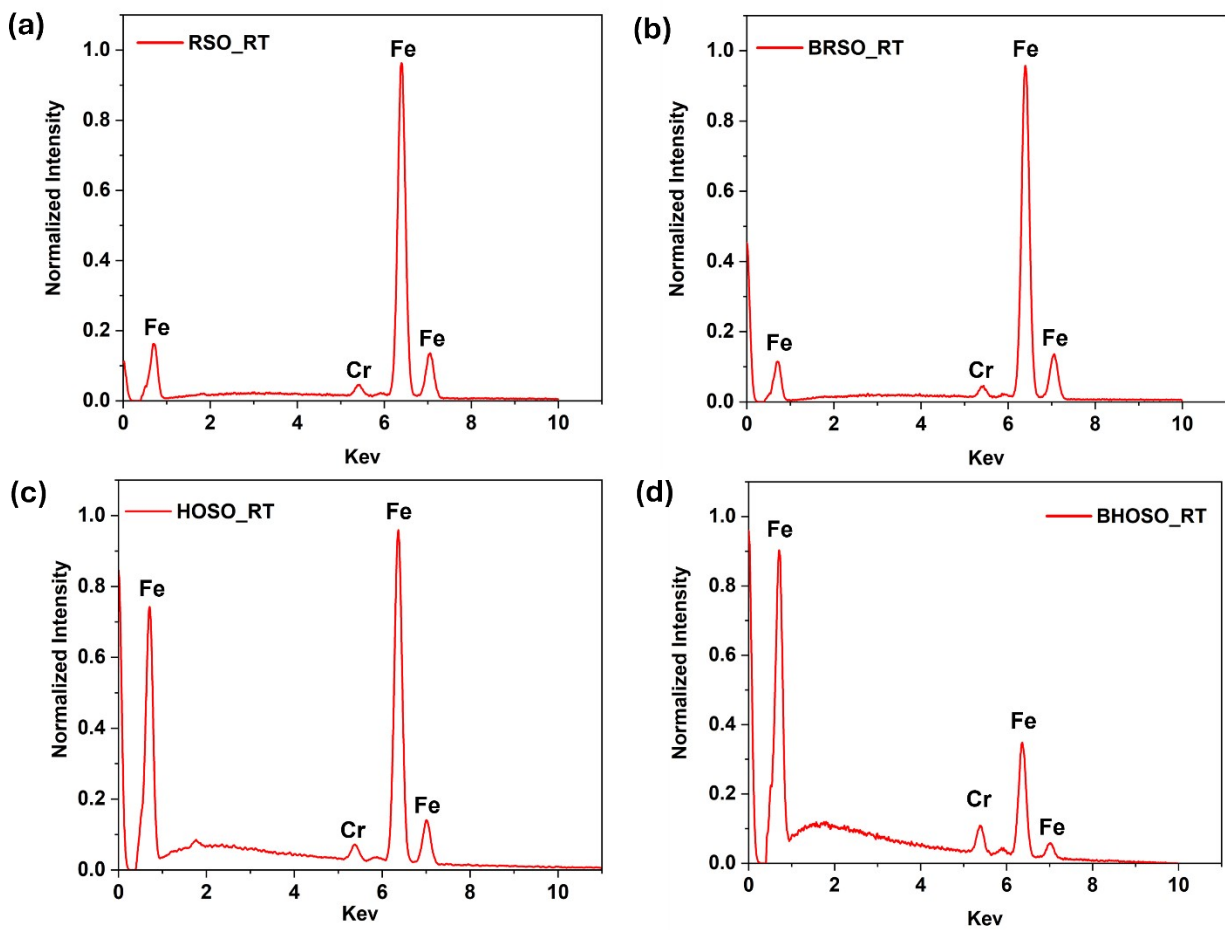

**Figure S2.** EDS analyses of the test samples at room temperature (a) RSO (b) BRSO (c) HOSO (d) BHOSO
